# Supplementary material
Source: PubMed Central journal article supplement (PMC1693675)
Supplement: pnas_0605508103_2.pdf [file pnas_0605508103_2.pdf]

**Table 2. General characteristics of PAMPs (pathogen-associated molecular patterns) and the PRRs (pathogen recognition receptors) responsible for their recognition as opposed to the features of Avr (avirulence) proteins and their corresponding PRRs (characteristics of AvrXa21 and XA21 are shown in bold if they appear to be unique compared with other known systems)**

| <b>PAMP • PRR General Characteristics</b>                                                                                                                                                                          | <b>AvrXa21 • XA21 Characteristics</b>                                                                                                                                                                                                                                                                                                                                                            | <b>Avr • PRR General Characteristics</b>                                                                                                                                                                                         |
|--------------------------------------------------------------------------------------------------------------------------------------------------------------------------------------------------------------------|--------------------------------------------------------------------------------------------------------------------------------------------------------------------------------------------------------------------------------------------------------------------------------------------------------------------------------------------------------------------------------------------------|----------------------------------------------------------------------------------------------------------------------------------------------------------------------------------------------------------------------------------|
| PAMP (e.g., flagellin) <ul style="list-style-type: none"> <li>- Conserved among diverse species</li> <li>- Required for lifecycle</li> <li>- Not typically actively secreted</li> </ul>                            | AvrXa21 <ul style="list-style-type: none"> <li>- Strain specific, but core molecule appears to be conserved among species</li> <li>- Activity is regulated in a cell-density-dependent manner by a two-component system</li> <li>- Synthesized in absence of plant host (thus part of lifecycle)</li> <li>- Absence compromises virulence in field</li> <li>- <b>Secreted by TOSS</b></li> </ul> | Avr (e.g., AvrRpt2) <ul style="list-style-type: none"> <li>- Strain specific</li> <li>- Many synthesized only in presence of host</li> <li>- Absence compromises virulence</li> <li>- From bacteria, secreted by TTSS</li> </ul> |
| PRR (e.g., FLS2) <ul style="list-style-type: none"> <li>- Extracellular (intracellular recognition only shown in animals)</li> <li>- Recognition and response does not lead to resistance in most cases</li> </ul> | XA21 <ul style="list-style-type: none"> <li>- Recognition likely extracellular</li> <li>- Confers dominant resistance</li> </ul>                                                                                                                                                                                                                                                                 | PRR (e.g., RPS2) <ul style="list-style-type: none"> <li>- In dicots, recognition mostly intracellular (characterized RLPs are an important exception)</li> <li>- Confers dominant resistance</li> </ul>                          |

**Supplemental Table 2. Primer sets for this study**

| Gene         | Primer          | Primer sequence              | Amplification region, length        |
|--------------|-----------------|------------------------------|-------------------------------------|
| <i>raxST</i> | <i>raxST1-F</i> | 5'-ACCATTTTCATTTCCGGGCT-3'   | 62 to 291 <sup>st</sup> , 230 bp    |
|              | <i>raxST1-R</i> | 5'-CAGCTCCTGGCGATTCTGG-3'    |                                     |
|              | <i>raxST2-F</i> | 5'-GGGCACGGTGTTCGACACCA-3'   | 292 to 520 <sup>th</sup> , 229 bp   |
|              | <i>raxST2-R</i> | 5'-CACGCCCCGCGGCGGTCA-3'     |                                     |
|              | <i>raxST3-F</i> | 5'-CTGCGCCAGGCGTTCTACGG-3'   | 601 to 838 <sup>th</sup> , 238 bp   |
|              | <i>raxST3-R</i> | 5'-GCGAAGGCGCGCTTTCCAG-3'    |                                     |
| <i>raxP</i>  | <i>raxP1-F</i>  | 5'-GACCCTGCCGCGCTGTCCC-3'    | 3 to 286 <sup>th</sup> , 284 bp     |
|              | <i>raxP1-R</i>  | 5'-CGCCATCAGGATTGATGTGC-3'   |                                     |
|              | <i>raxP2-F</i>  | 5'-ATCGACACACGCTGGAAGTT-3'   | 187 to 523 <sup>rd</sup> , 337 bp   |
|              | <i>raxP2-R</i>  | 5'-TGCGCGCGTTGTAGAGAT-3'     |                                     |
|              | <i>raxP3-F</i>  | 5'-GTGGAATCTCTACAACGCGC-3'   | 501 to 800 <sup>th</sup> , 300 bp   |
|              | <i>raxP3-R</i>  | 5'-GCTTCCAGCGTGTGCGCACTG-3'  |                                     |
| <i>raxC</i>  | <i>raxC1-F</i>  | 5'-GCCACCGACCTGCTGCAGGT-3'   | 61 to 409 <sup>th</sup> , 349 bp    |
|              | <i>raxC1-R</i>  | 5'-GAAATACGCCGCCGAGGTAC-3'   |                                     |
|              | <i>raxC2-F</i>  | 5'-CCAACAACGATCTGATGACG-3'   | 368 to 654 <sup>th</sup> , 287 bp   |
|              | <i>raxC2-R</i>  | 5'-CAATGCACGCAAACCAACTA-3'   |                                     |
|              | <i>raxC3-F</i>  | 5'-TACGAGCAGCAGAAGCGCGC-3'   | 1021 to 1306 <sup>th</sup> , 285 bp |
|              | <i>raxC3-R</i>  | 5'-CGGTGATGTCGAGCTTGCCG-3'   |                                     |
| <i>raxR</i>  | <i>raxR1-F</i>  | 5'-CGGCTGCTGGTCATTGAAGAC-3'  | 4 to 337 <sup>th</sup> , 334 bp     |
|              | <i>raxR1-R</i>  | 5'-CTCGGGCAGTGCAAAGGG-3'     |                                     |
|              | <i>raxR2-F</i>  | 5'-GCGCCGGCTGCGCGAACAGCAC-3' | 195 to 515 <sup>th</sup> , 321 bp   |
|              | <i>raxR2-R</i>  | 5'-GCATCAGCACTTCGAGCAAC-3'   |                                     |
|              | <i>raxR3-F</i>  | 5'-GCCGCAAGTTGCTCGAAGT-3'    | 488 to 707 <sup>th</sup> , 220 bp   |
|              | <i>raxR3-R</i>  | 5'-CATACAGCTGCGCCGGTAG-3'    |                                     |
| 16S rRNA     | rRNA-F          | 5'-TAGCTCAGGTGGTTAGAGCGC-3'  |                                     |
|              | rRNA-R          | 5'-CAACGCGAACATACGACTCAA-3'  |                                     |
