# Supplementary material
Source: PubMed Central journal article supplement (PMC1693675)

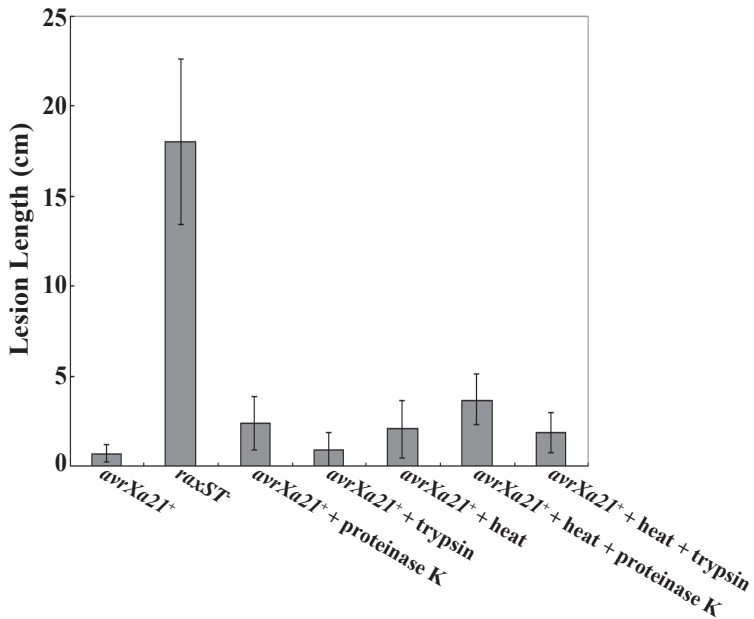

Supplement: pnas_0605508103_1.pdf [file pnas_0605508103_1.pdf]
